# Supplementary material for: Semisynthesis reveals apoptin as a tumour-selective protein prodrug that causes cytoskeletal collapse
Source: Royal Society of Chemistry journal article supplement (doi:10.1039/d2sc04481a), 2023-01-01
Supplement: d2sc04481a1.pdf [file d2sc04481a1.pdf]

Supplementary data for:

## Semisynthesis reveals Apoptin as a tumour-selective protein prodrug that causes cytoskeletal collapse

Jasmine Wyatt<sup>1,2</sup>, Yuen Ka Chan<sup>1</sup>, Mateusz Hess<sup>2</sup>, Mahvash Tavassoli<sup>1,\*</sup> and Manuel M. Müller<sup>2,\*</sup>

*1 Department of Molecular Oncology, King's College London, Guy's Hospital Campus, Hodgkin Building, London SE1 1UL, UK*

*2 Department of Chemistry, King's College London, Britannia House, 7 Trinity Street, London, SE1 1DB, UK*

\*Correspondence to M.T. ([mahvash.tavassoli@kcl.ac.uk](mailto:mahvash.tavassoli@kcl.ac.uk)) or M.M.M. ([manuel.muller@kcl.ac.uk](mailto:manuel.muller@kcl.ac.uk))

### Supplementary Figures S1-13

|                                                                                         |    |
|-----------------------------------------------------------------------------------------|----|
| Figure S1: Synthesis of Apoptin C-terminal peptides.....                                | 2  |
| Figure S2: Production of Apoptin-thioester .....                                        | 3  |
| Figure S3: Significant hydrolysis of thioester during NCL .....                         | 4  |
| Figure S4: Production of Apoptin-WT .....                                               | 5  |
| Figure S5: Circular dichroism spectra of renatured Apoptin variants.....                | 6  |
| Figure S6: Efficient transduction of Apoptin-WT using the TAT system.....               | 7  |
| Figure S7: Production of Apoptin-Mut.....                                               | 8  |
| Figure S8: Apoptotic activity of Apoptin variants analysed via FACS.....                | 9  |
| Figure S9: Synthesis of biotinylated Apoptin peptides .....                             | 10 |
| Figure S10: Apoptin interaction to known targets.....                                   | 11 |
| Figure S11: Thr108 contributes to intracellular localisation of Apoptin.....            | 12 |
| Figure S12: Apoptin does not interfere with cytoskeleton of healthy cells.....          | 13 |
| Figure S13: Lethal doses of Apoptin disrupt the cytoskeleton and perturb cell size..... | 14 |

Figure S1

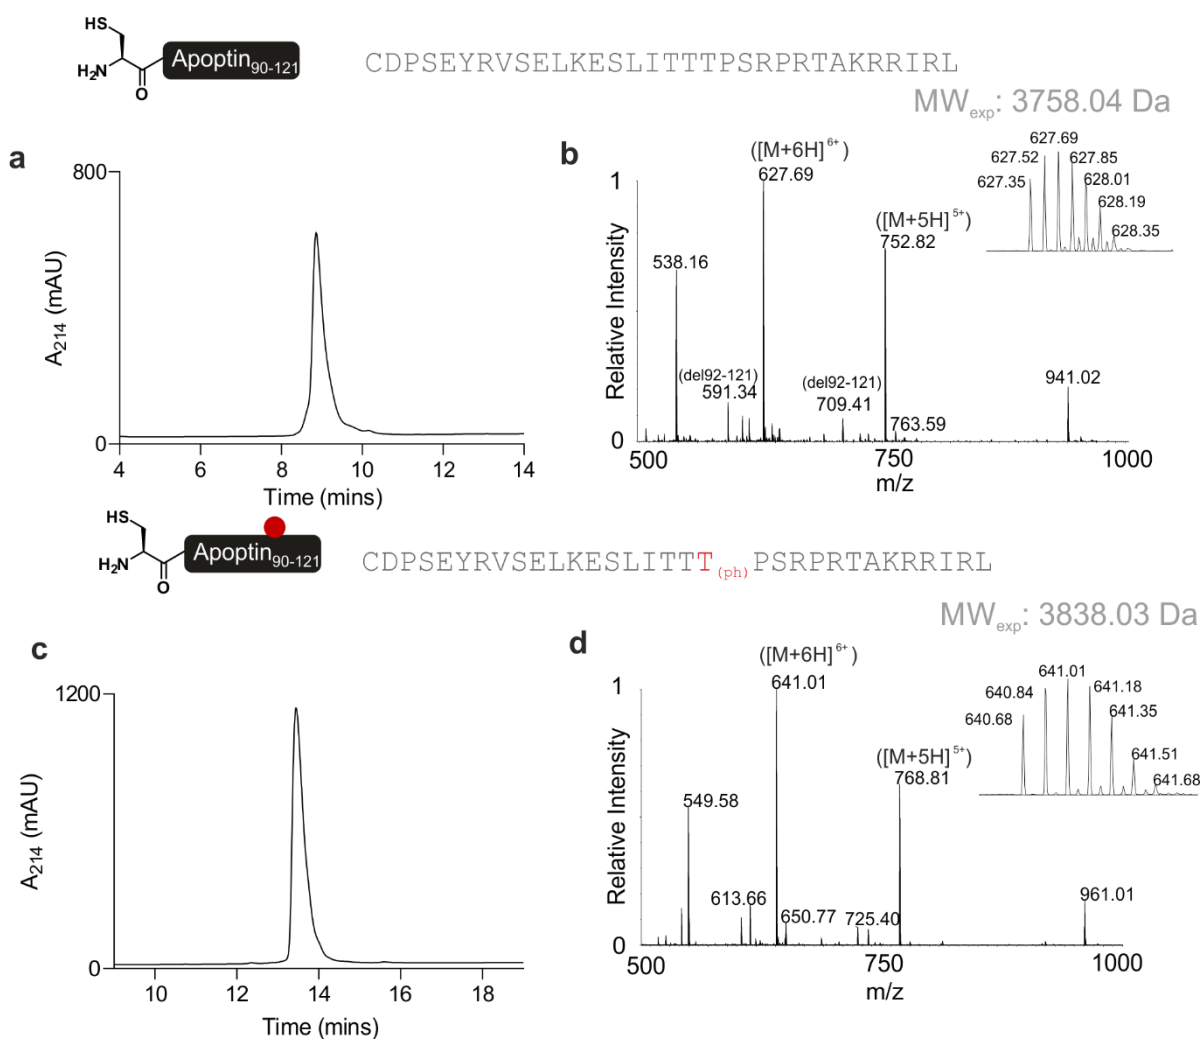

### Figure S1: Synthesis of Apoptin C-terminal peptides

Peptides (Apoptin<sub>90-121</sub> and Apoptin<sub>90-121</sub>-T108ph) were synthesis via Fmoc-SPPS and purified with RP-HPLC as described in the methods. a) RP-HPLC data and (b) MS data for the unmodified peptide (Expected mass 3758.04 Da, Observed mass 3758.06 Da). c) RP-HPLC data and (d) MS data for the T108ph peptide (Expected mass 3838.00 Da, Observed mass 3838.03 Da).

**Figure S2**

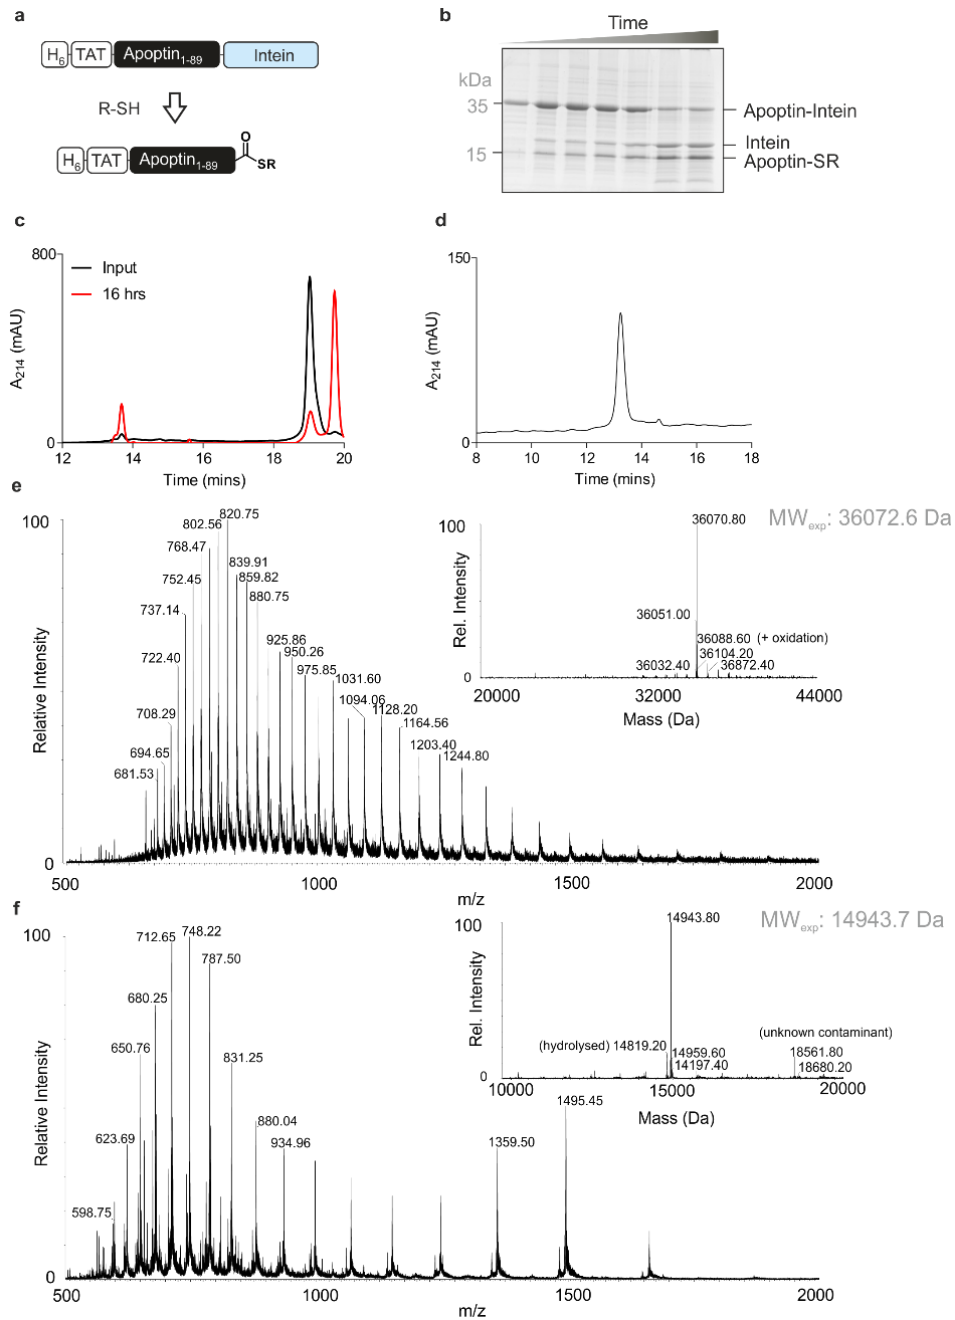

**Figure S2: Production of Apoptin-thioester**

a) Schematic for the thiolysis reaction. b) SDS-PAGE analysis of the thiolysis reaction over 16 hours. c) RP-HPLC analysis of the thiolysis reaction over 16 hours. d) RP-HPLC analysis of the isolated protein thioester. e) Mass spectrometry of the starting material corresponding to Apoptin-Intein (Expected mass 36072.6 Da, Observed mass 36070.8 Da). f) Mass spectrometry of the isolated protein thioester (Expected mass 14943.7 Da, Observed mass 14943.8 Da; hydrolysed expected mass 14819.2 Da).

**Figure S3**

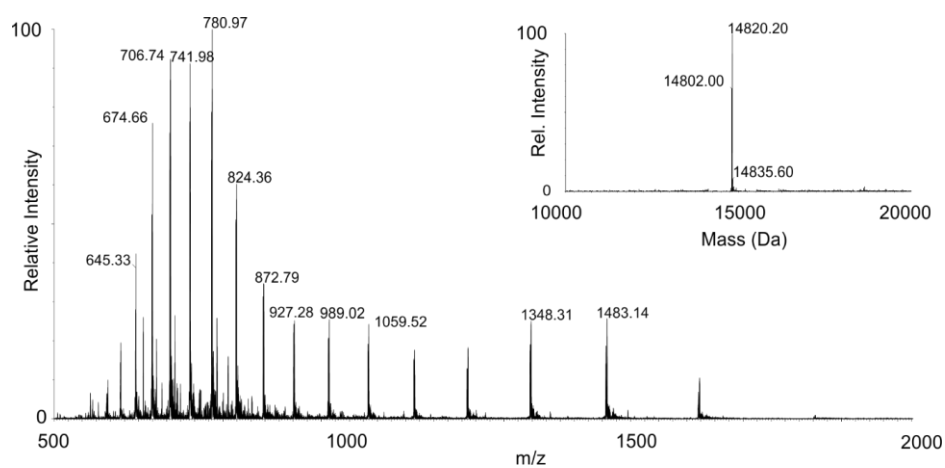

**Figure S3: Significant hydrolysis of thioester during NCL**

Mass spectrometry analysis of the thioester during the NCL reaction (Expected mass 14820.6 Da, observed mass 14820.2 Da).

**Figure S4**

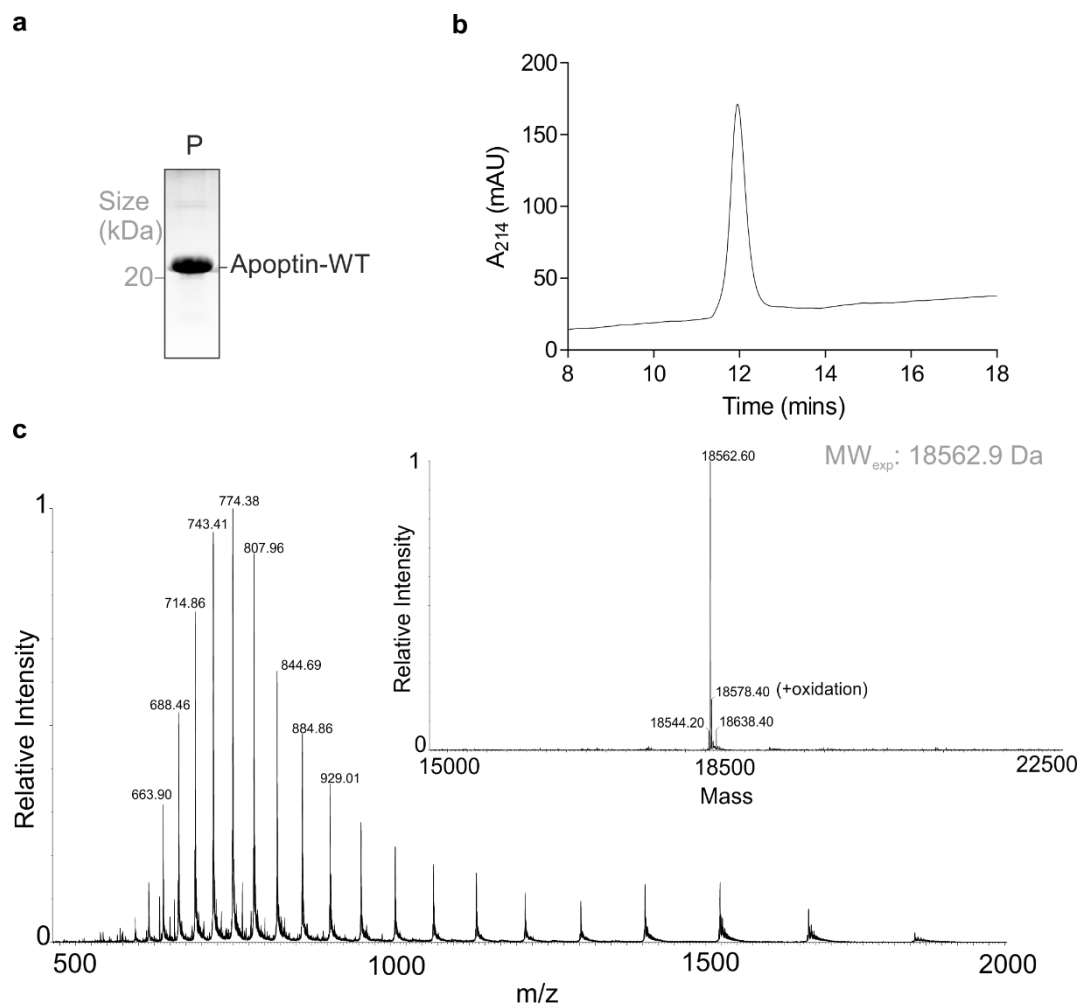

**Figure S4: Production of Apoptin-WT**

a) RP-HPLC and b) SDS-PAGE of purified and renatured Apoptin-WT. c) Mass spectrometry analysis of final product. Expected mass (-Met): 18562.9 Da, observed mass: 18562.6 Da.

Figure S5

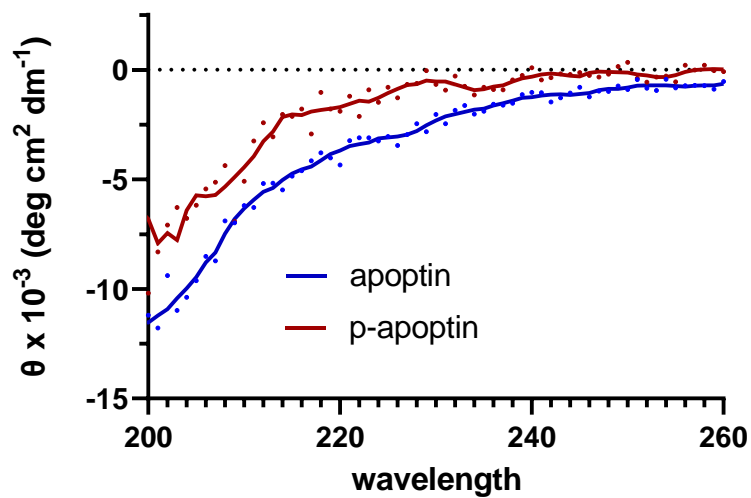

**Figure S5: Circular dichroism spectra of renatured Apoptin variants.**

Points represent an average from 3 circular dichroism wavelength scans of Apoptin-WT (blue) and Apoptin-T108ph (red). The lines represent smoothed spectra. Bestsel software was used to determine secondary structure content (Apoptin-WT: 27% Antiparallel  $\beta$ -Sheet, 20% Turn, 53% Others; Apoptin-T108ph: 28% Antiparallel  $\beta$ -Sheet, 24% Turn, 44% Others).<sup>[1]</sup>

**Figure S6**

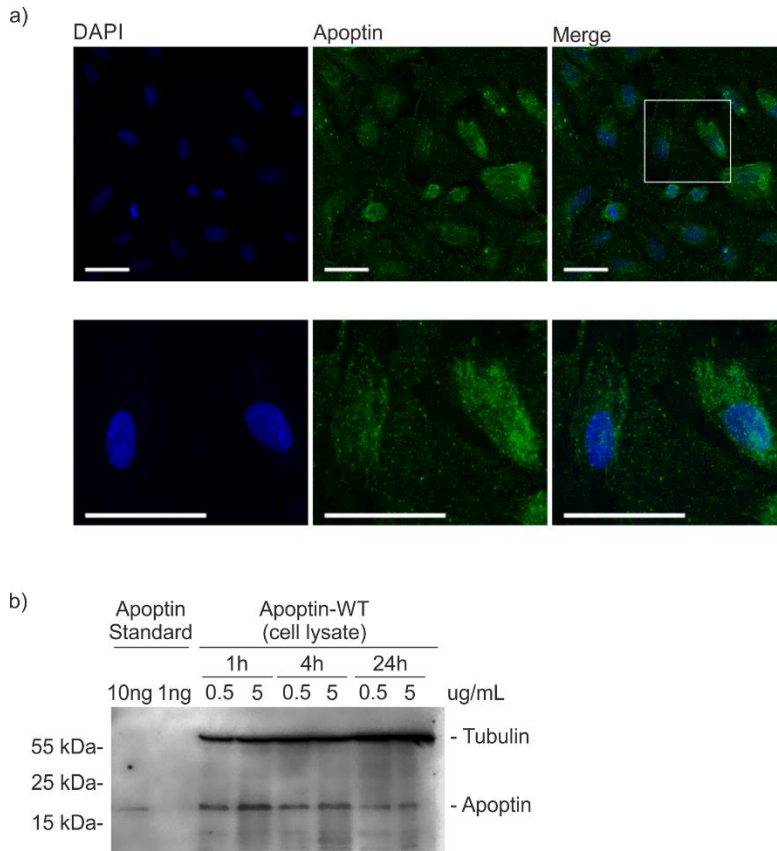

**Figure S6: Efficient transduction of Apoptin-WT using the TAT system.**

a) Immunofluorescence analysis of SAOS-2 cells delivered with Apoptin-WT. Cells were incubated with recombinant Apoptin-WT for 15 minutes, then fixed and stained with anti-HA antibodies. Cells were imaged at 60x magnification. The white box indicates the area that has been zoomed in as seen below. Scale bar=40  $\mu$ m. b) Western blot analysis of Apoptin-WT delivery to HSC-3 cells. Cells were treated with 1 mL of 0.5 or 5  $\mu$ g/mL Apoptin-WT for 15 minutes, washed and incubated for the indicated duration. Each lane contains lysate from approx. 200'000-300'000 cells of a total of  $1.5 \cdot 10^6$  (1h),  $2.4 \cdot 10^6$  (4h) and  $3.4 \cdot 10^6$  (24h) cells. 10 ng and 1 ng of purified Apoptin-WT were analysed as a control. Apoptin was visualised with an anti-HA antibody, Tubulin was used as a loading control.

**Figure S7**

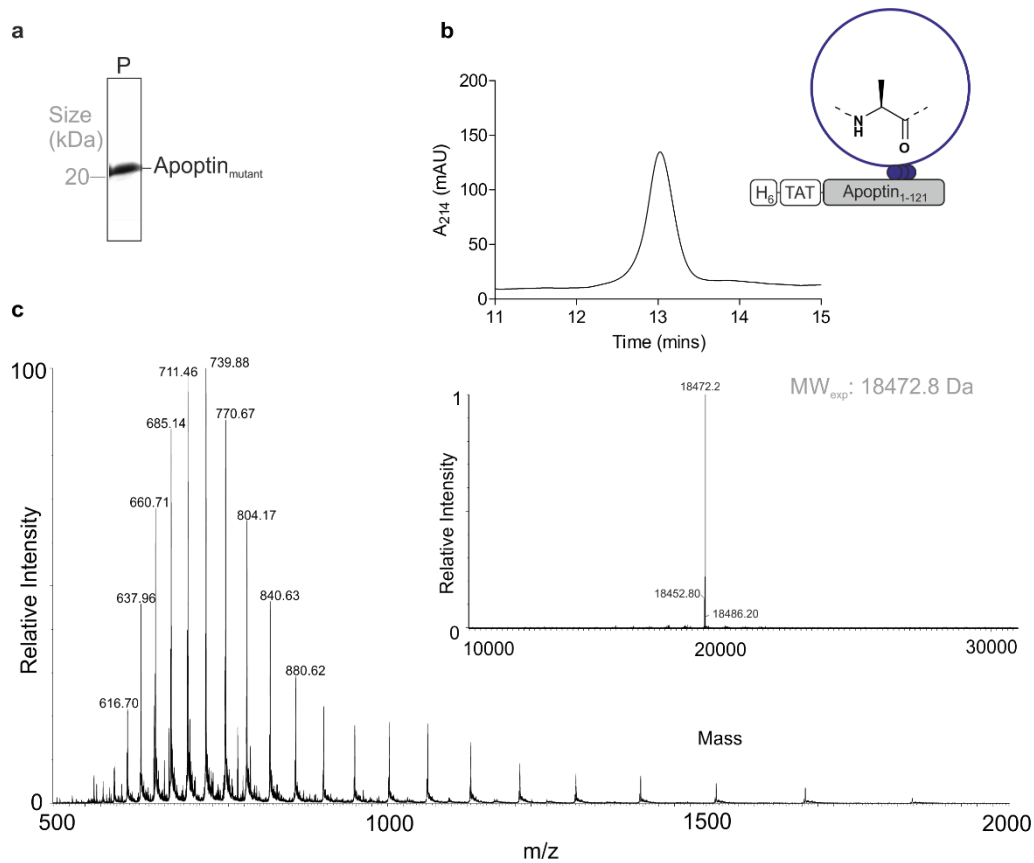

**Figure S7: Production of Aoptin-Mut**

a) RP-HPLC and b) SDS-PAGE of purified and renatured mutant Aoptin. c) Mass spectrometry analysis of final product (expected mass: 18472.8 Da, observed mass 18472.2 Da).



Figure S8

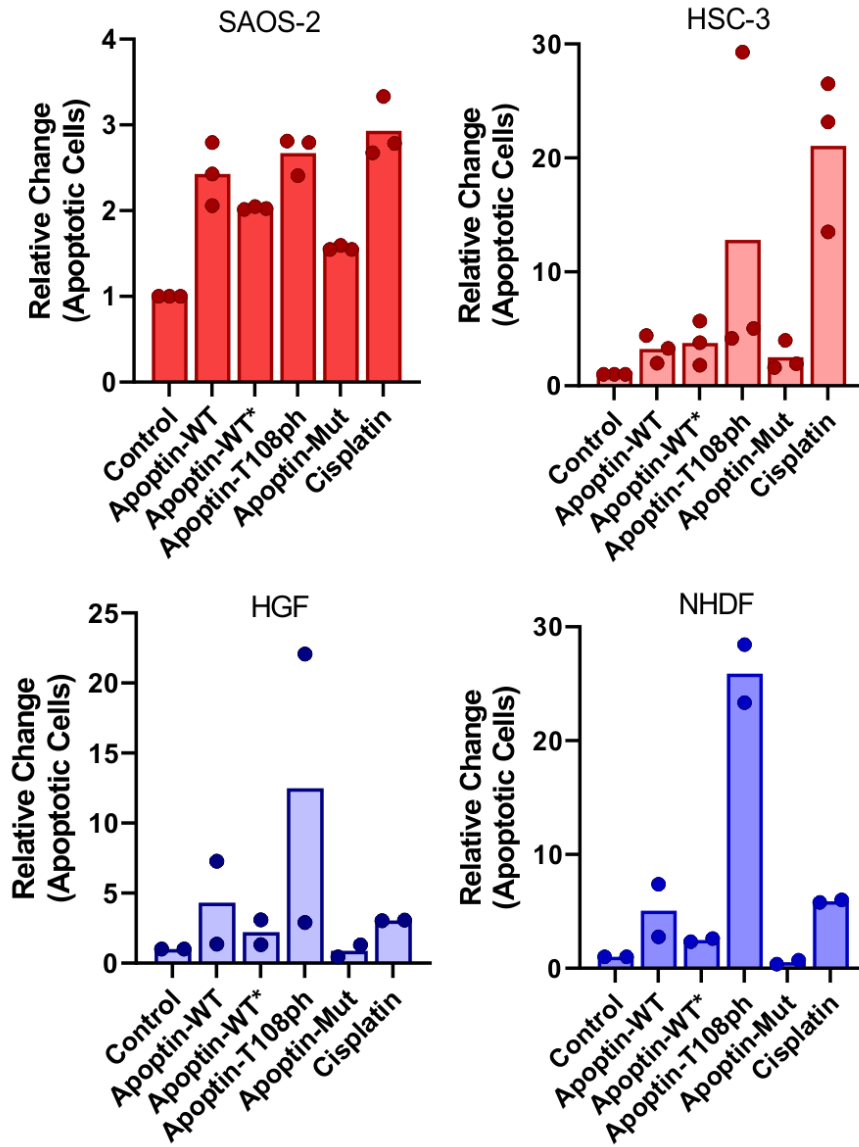

Figure S8: Apoptotic activity of Apoptin variants analysed via FACS.

Showing relative total Annexin V positive populations for cancer cell-lines (red, n=3) and healthy lines (blue, n=2).

Figure S9

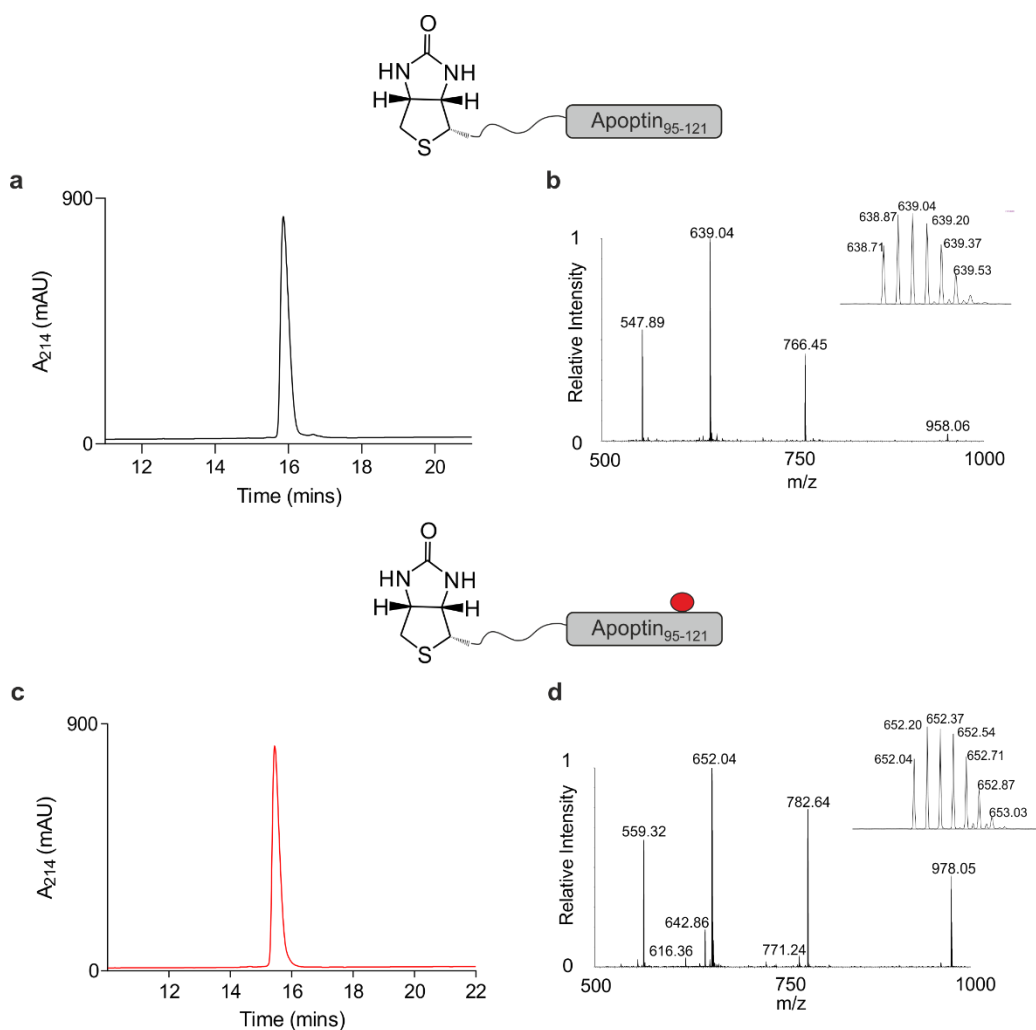

**Figure S9: Synthesis of biotinylated Apoptin peptides**

Apoptin-derived peptides were synthesized with an N-terminal biotin handle via Fmoc-SPPS and purified with RP-HPLC as described in the methods section. RP-HPLC and MS data of unmodified peptide (a, b; Expected mass: 3826.17 Da, Observed mass: 3826.26 Da) and Thr108ph peptide (c, d; Expected mass: 3906.14 Da, Observed mass: 3906.20 Da).

**Figure S10**

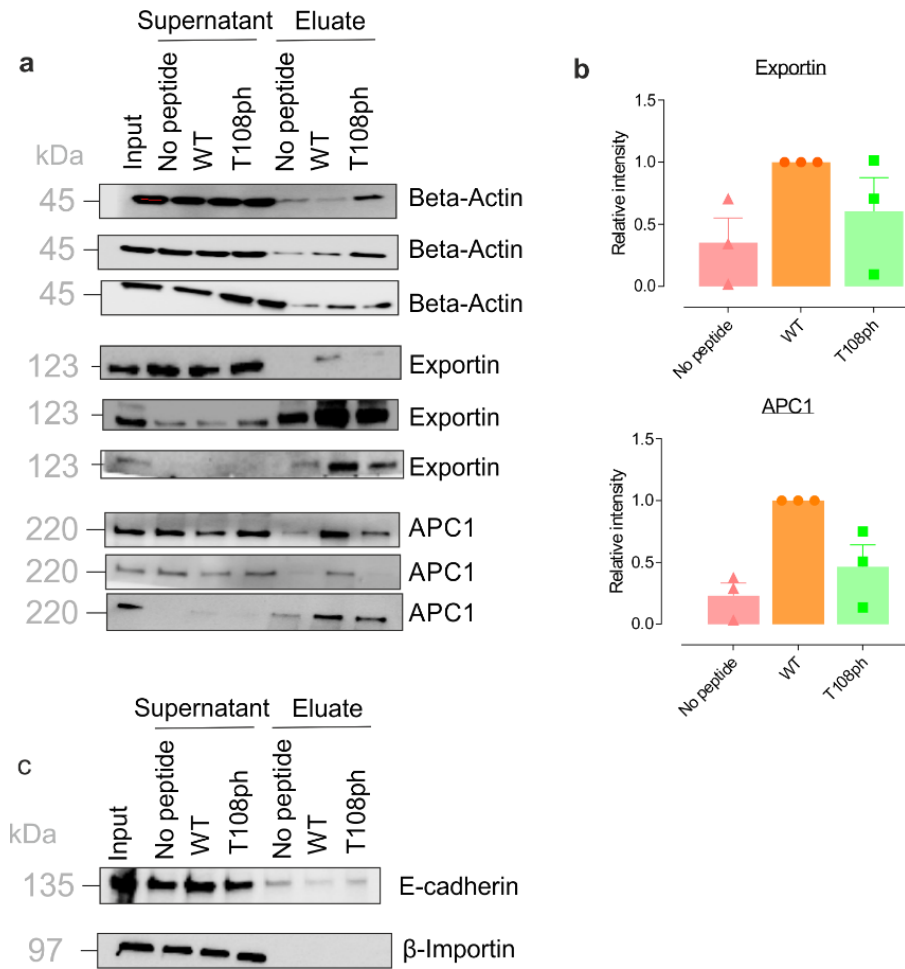

**Figure S10: Apoptin interaction to known targets**

a) Western blot analysis of beta-actin, exportin and APC1 pull-downs with wild-type and T108ph Apoptin peptides. Three independent replicates are shown. b) Quantification of Exportin (CRM-1) and APC1 pull-downs ( $n=3$ ,  $\pm$  SEM). c) Western blot analysis of E-cadherin and beta-importin pull-downs, showing that C-terminal Apoptin peptides does not interact with these targets.

**Figure S11**

(a)

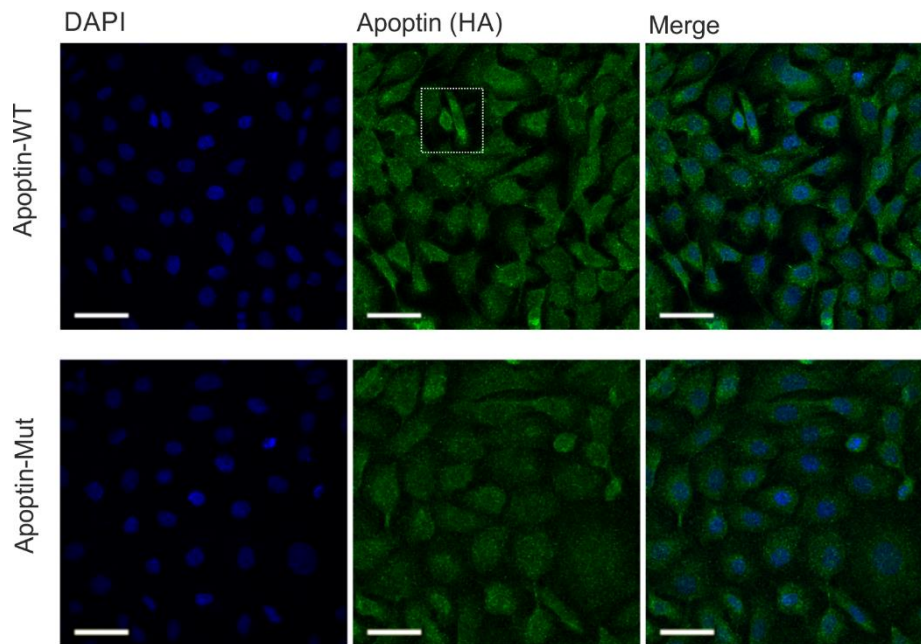

(b)

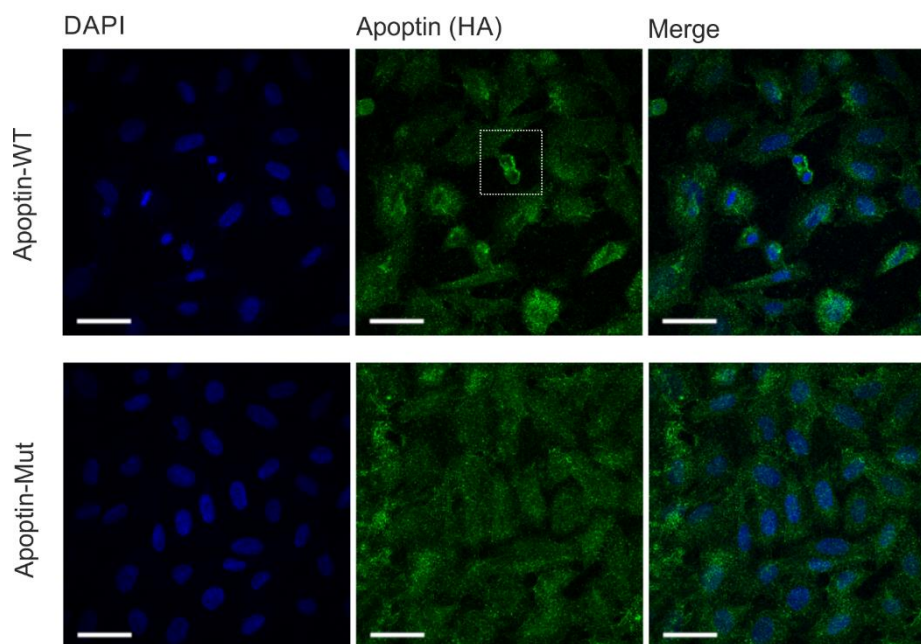

**Figure S11: Thr108 contributes to intracellular localisation of Apoptin.**

Immuno-fluorescence performed in SAOS-2 (a) and HSC-3 (b) cells after treatment with Apoptin-WT (top) and Apoptin-Mut (bottom) for 24h. Dotted boxes highlight regions of peri-nuclear accumulation in cells with condensed nuclei. 60x magnification. Scale bar= 40  $\mu$ M.

**Figure S12**

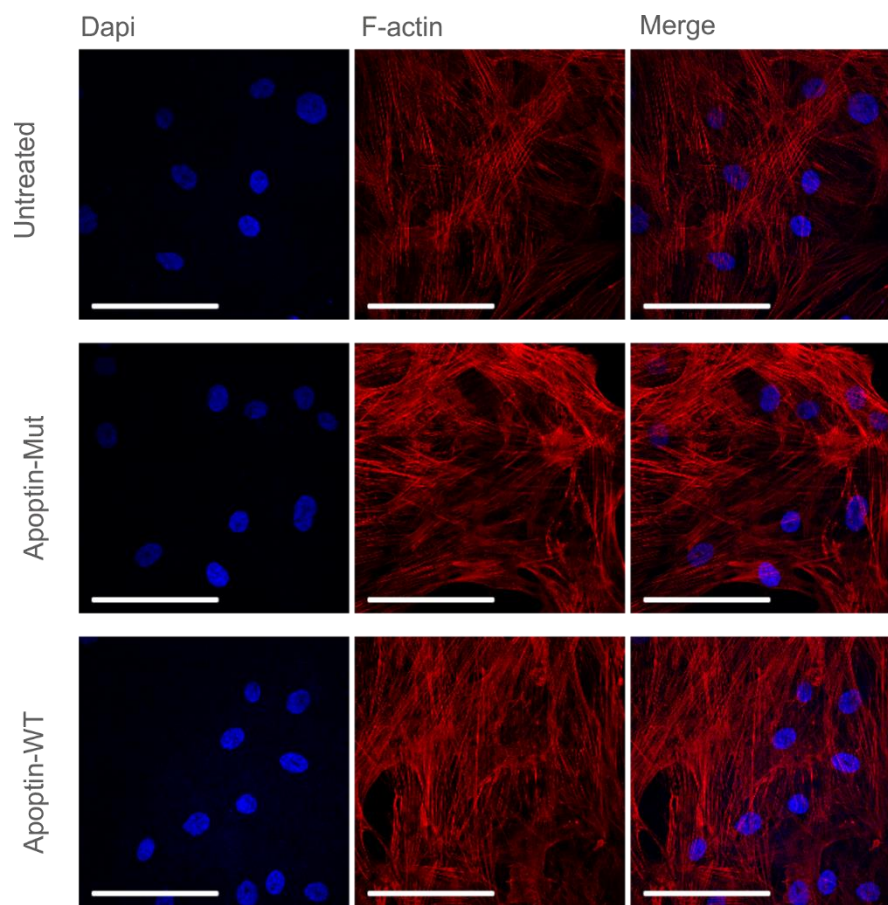

**Figure S12: Apoptin does not interfere with cytoskeleton of healthy cells**

Immuno-fluorescence images of HGF cells treated with sub-lethal doses (0.5 µg/mL) recombinant and mutant Apoptin and stained for F-Actin. Cells were imaged at 60x magnification, scale bar=40 µm.

**Figure S13**

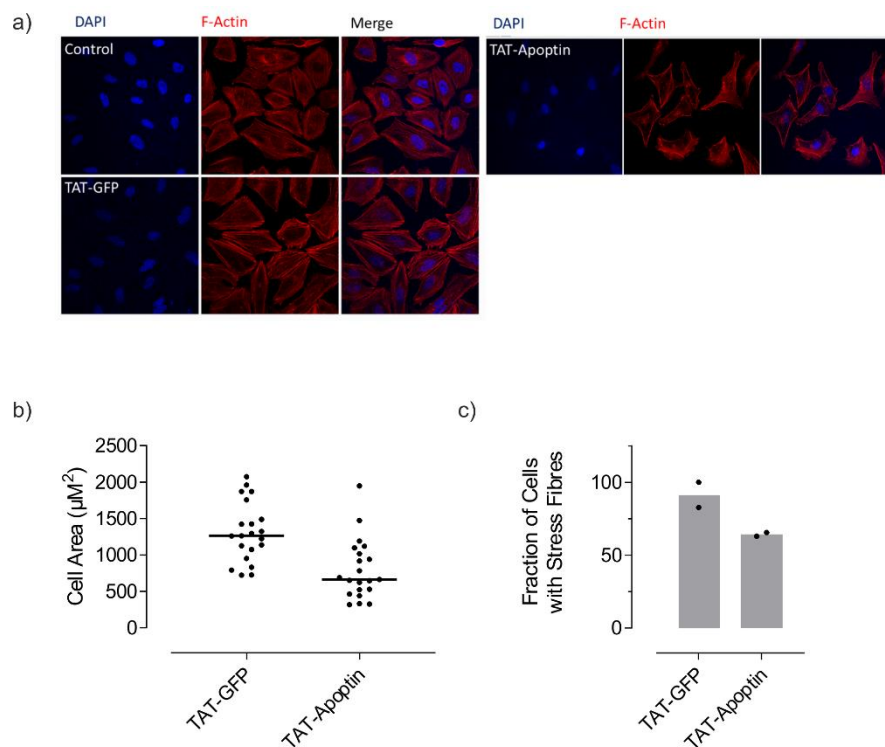

**Figure S13: Lethal doses of Apoptin disrupt the cytoskeleton and perturb cell size.**

a) Immuno-fluorescence of SAOS-2 cells treated with 5 µg/mL Apoptin for 15 min and incubated for 24h before fixing and staining with TRITC-phalloidin and DAPI. Cells were imaged at a 60x magnification. At least 20 cells from field of view were analysed for cell size (b) and scored for prominent stress fibre formation (c) (56 cells from 2 independent experiments).

### Supplementary References

- [1] A. Micsonai, F. Wien, L. Kernya, Y.-H. Lee, Y. Goto, M. Réfrégiers, J. Kardos, *PNAS* **2015**, *112*, E3095-E3103.
